# Supplementary material for: Optimal guideRNAs for re-directing deaminase activity of hADAR1 and hADAR2 in trans
Source: PubMed Central journal article supplement (PMC4041445; doi:10.1093/nar/gku272), 2014-04-15

## Supporting Information

### Optimal guideRNAs for Re-directing Deaminase Activity of hADAR1 and hADAR2 in trans

Marius F. Schneider, Jacqueline Wettengel, Patrick C. Hoffmann and Thorsten Stafforst

### Sequencing results

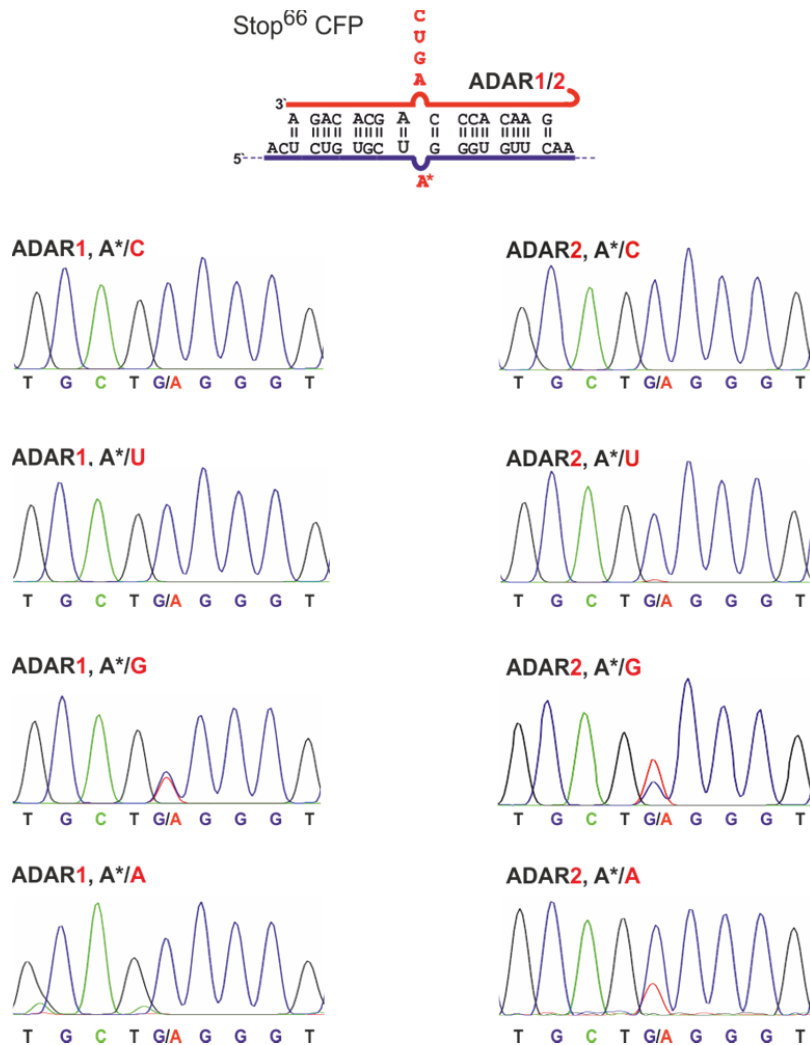

**Figure S1.** Effect of the counter base in our standard Stop<sup>66</sup> CFP transcript. The adenosine base (A\*) of the Stop<sup>66</sup> codon (UA\*G) was either paired with uridine or mismatched with cytosine, guanosine or adenosine by incubating the mRNA with one of the four BG-modified guideRNAs 5'-BG-r(UCG GAA CAC CC~~X~~AGC ACA GA), with X = C, U, G, or A. The standard editing conditions (concentrations, editing times, etc.) including 0.75 mM magnesium have applied as described in the method part of the manuscript.



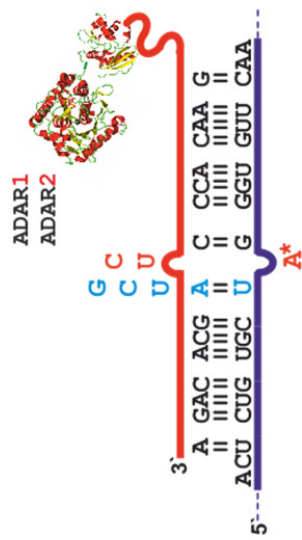

**Figure S2.2** Replicate of experiments shown in Figure S2.1, editing of the **UAG codon** under standard conditions including 0.75 mM magnesium.

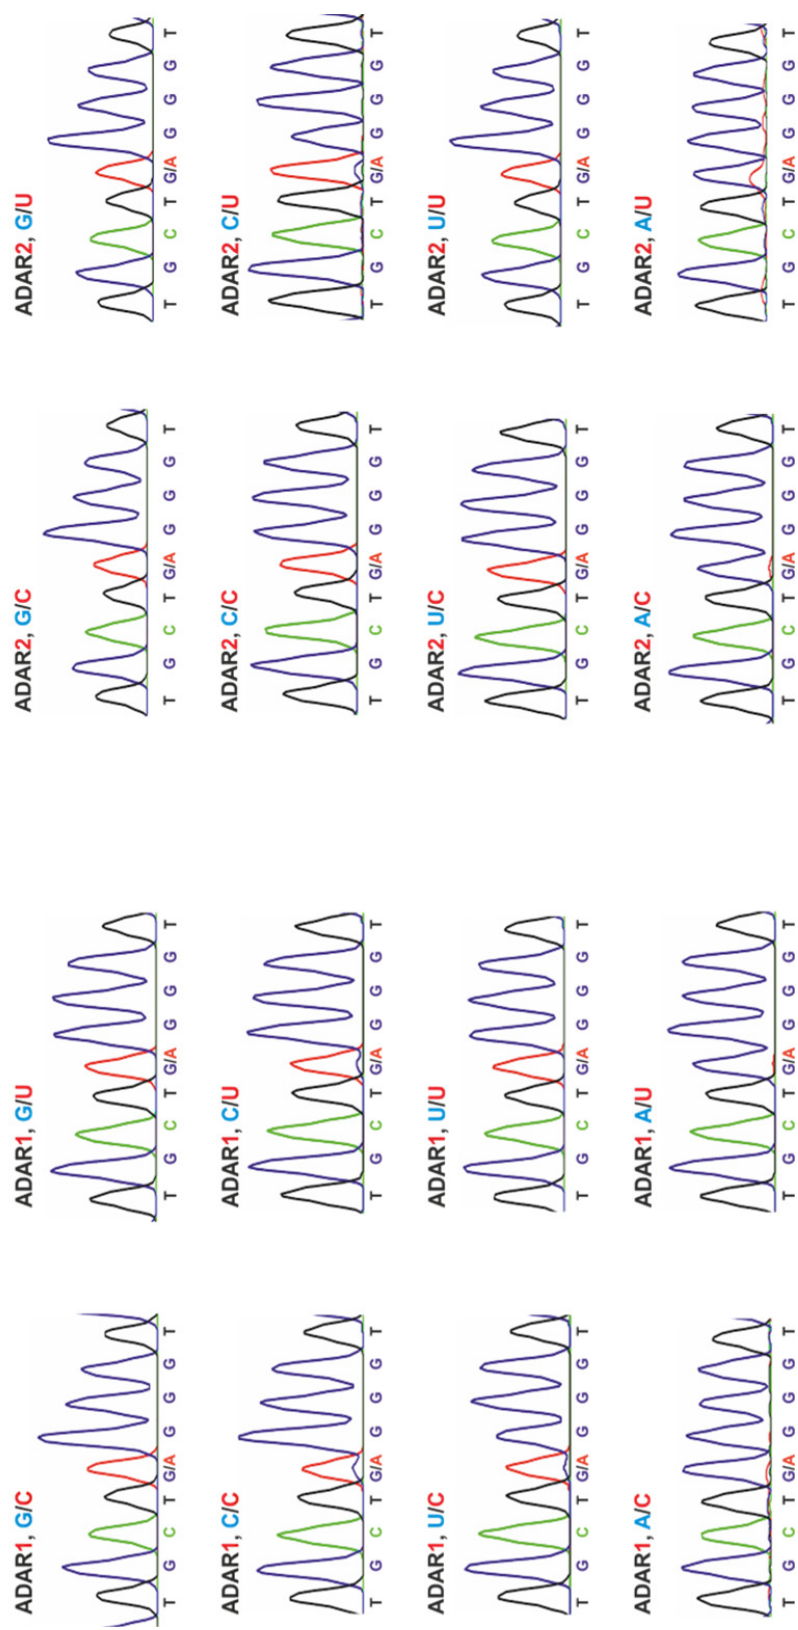

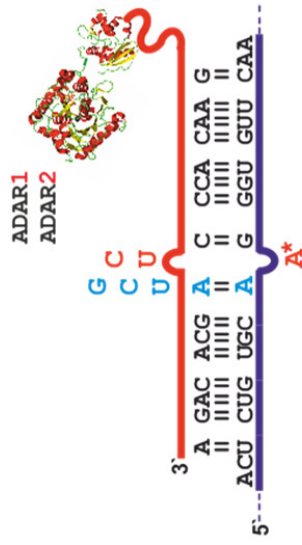

**Figure S3.1.** Sequencing traces for the editing of the **AAG codon** under standard conditions including 0.75 mM magnesium as described in the method part of the manuscript.

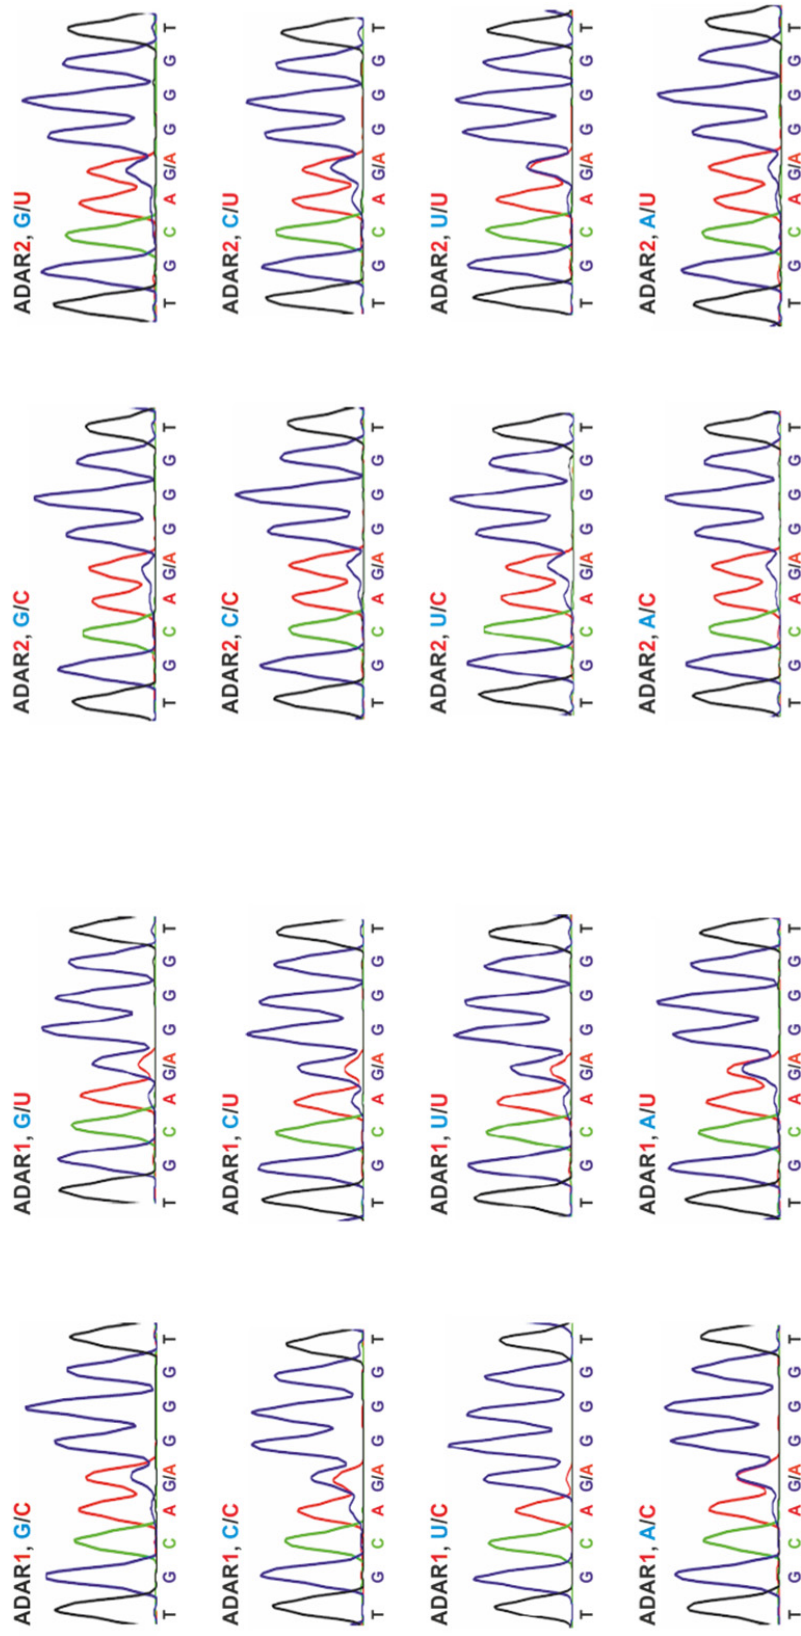

**Figure S3.2.** Replicate of the editing of the **AAG** codon with 0.75 mM magnesium as in Figure S3.

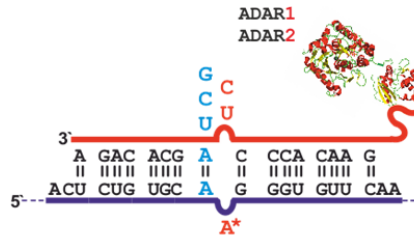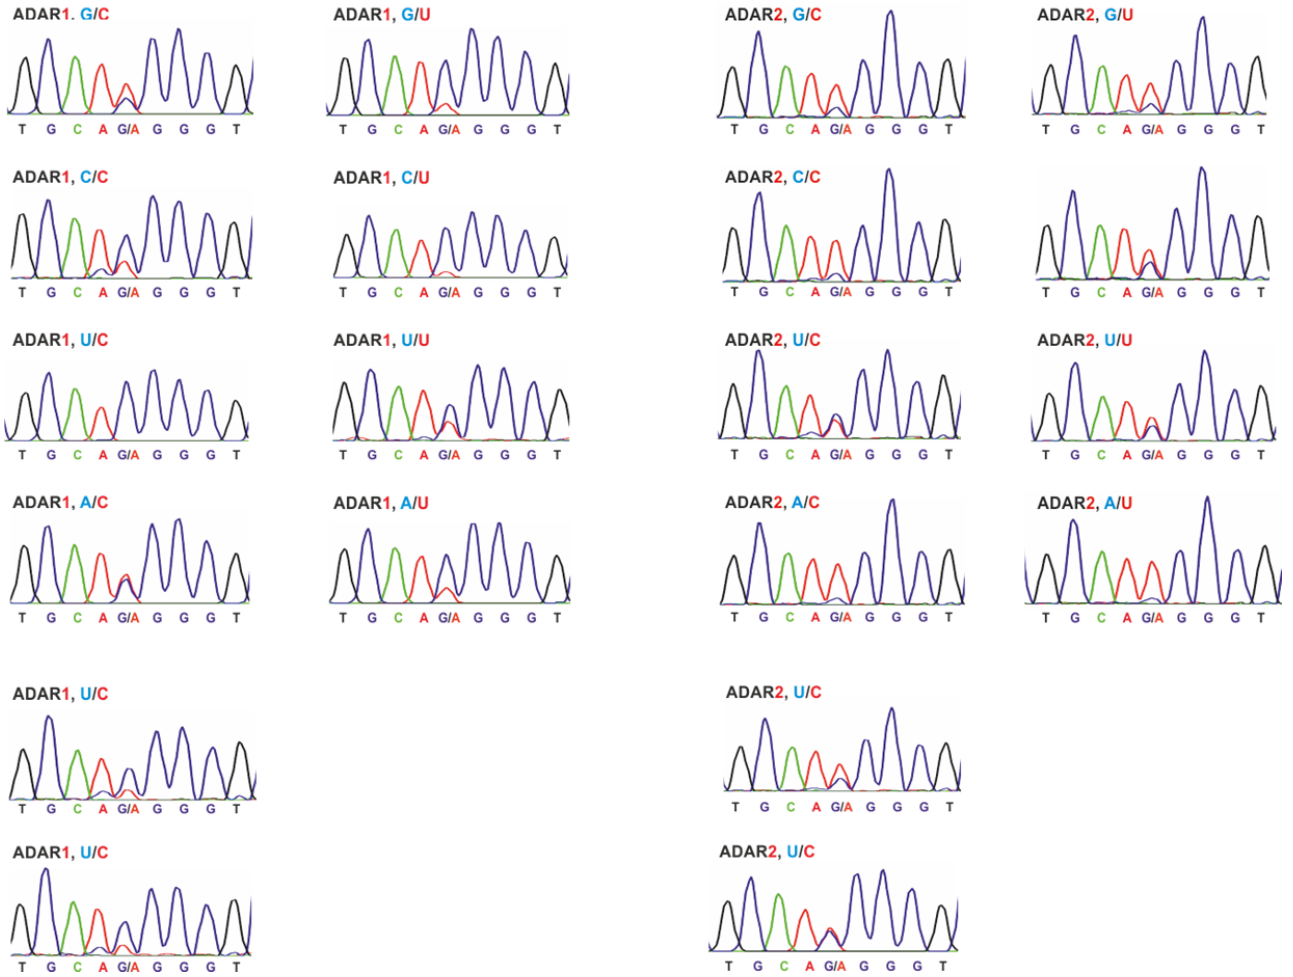



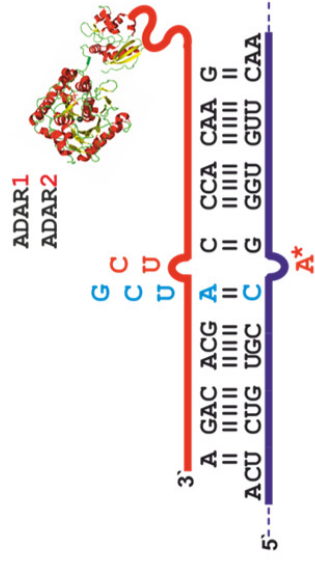

**Figure S4.1.** Sequencing traces for the editing of the **CAG codon** under standard conditions including 0.75 mM magnesium as described in the method part of the manuscript.

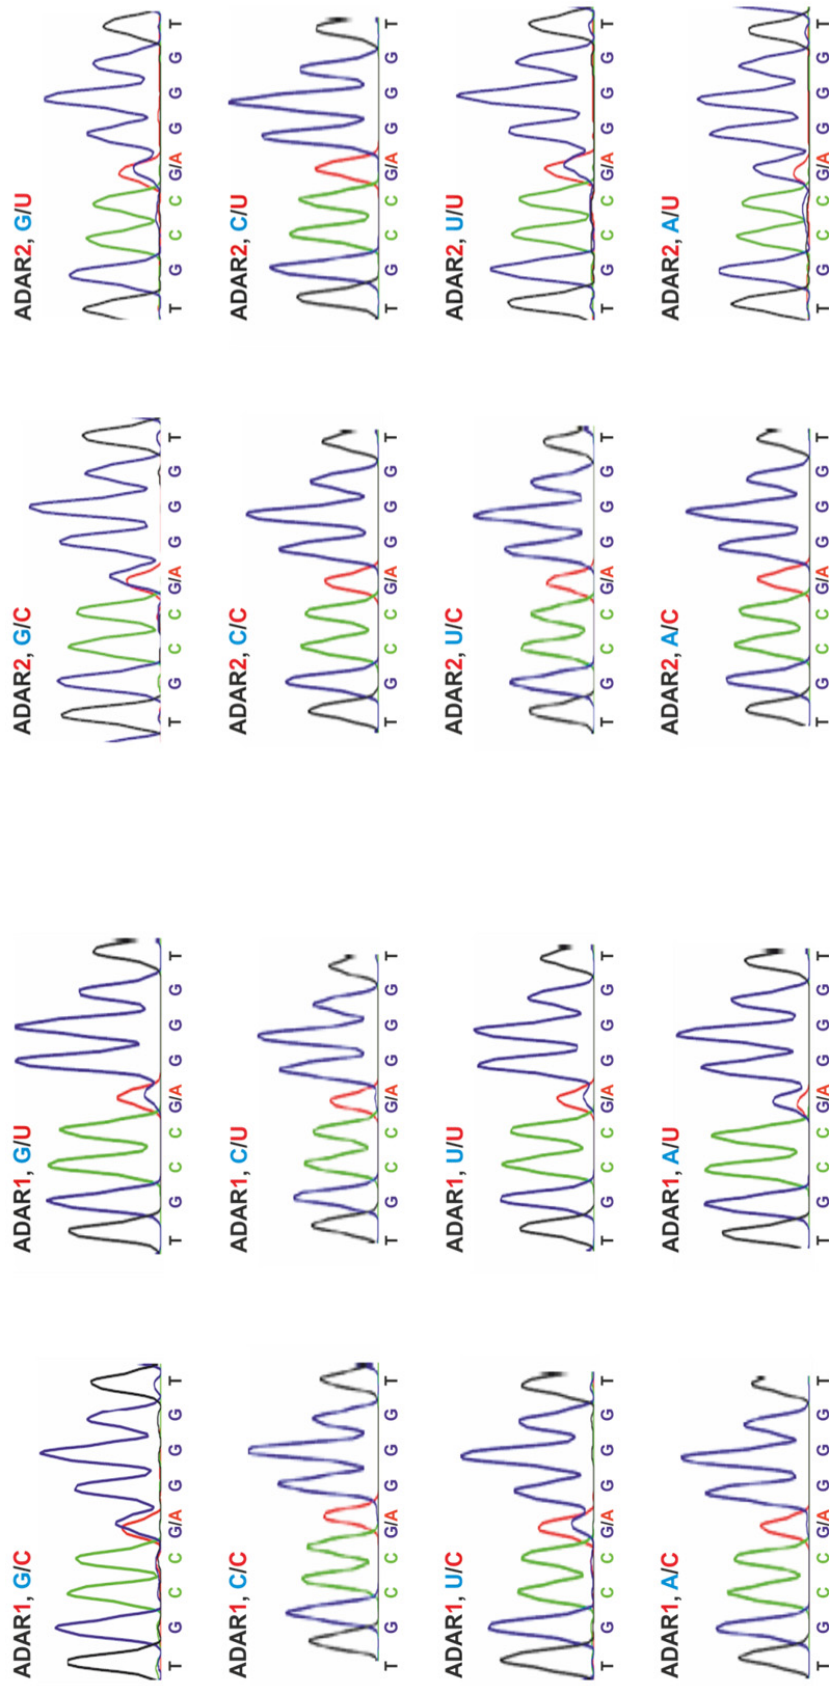



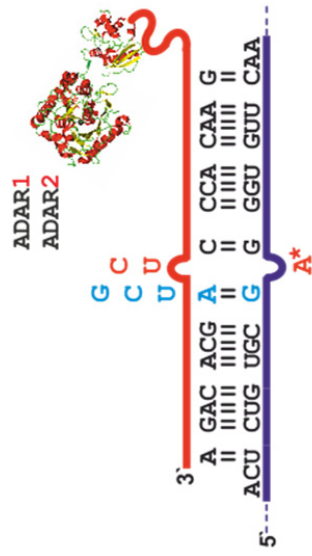

**Figure S5.1.** Sequencing traces for the editing of the **GAG codon** under standard conditions including 0.75 mM magnesium as described in the method part of the manuscript.

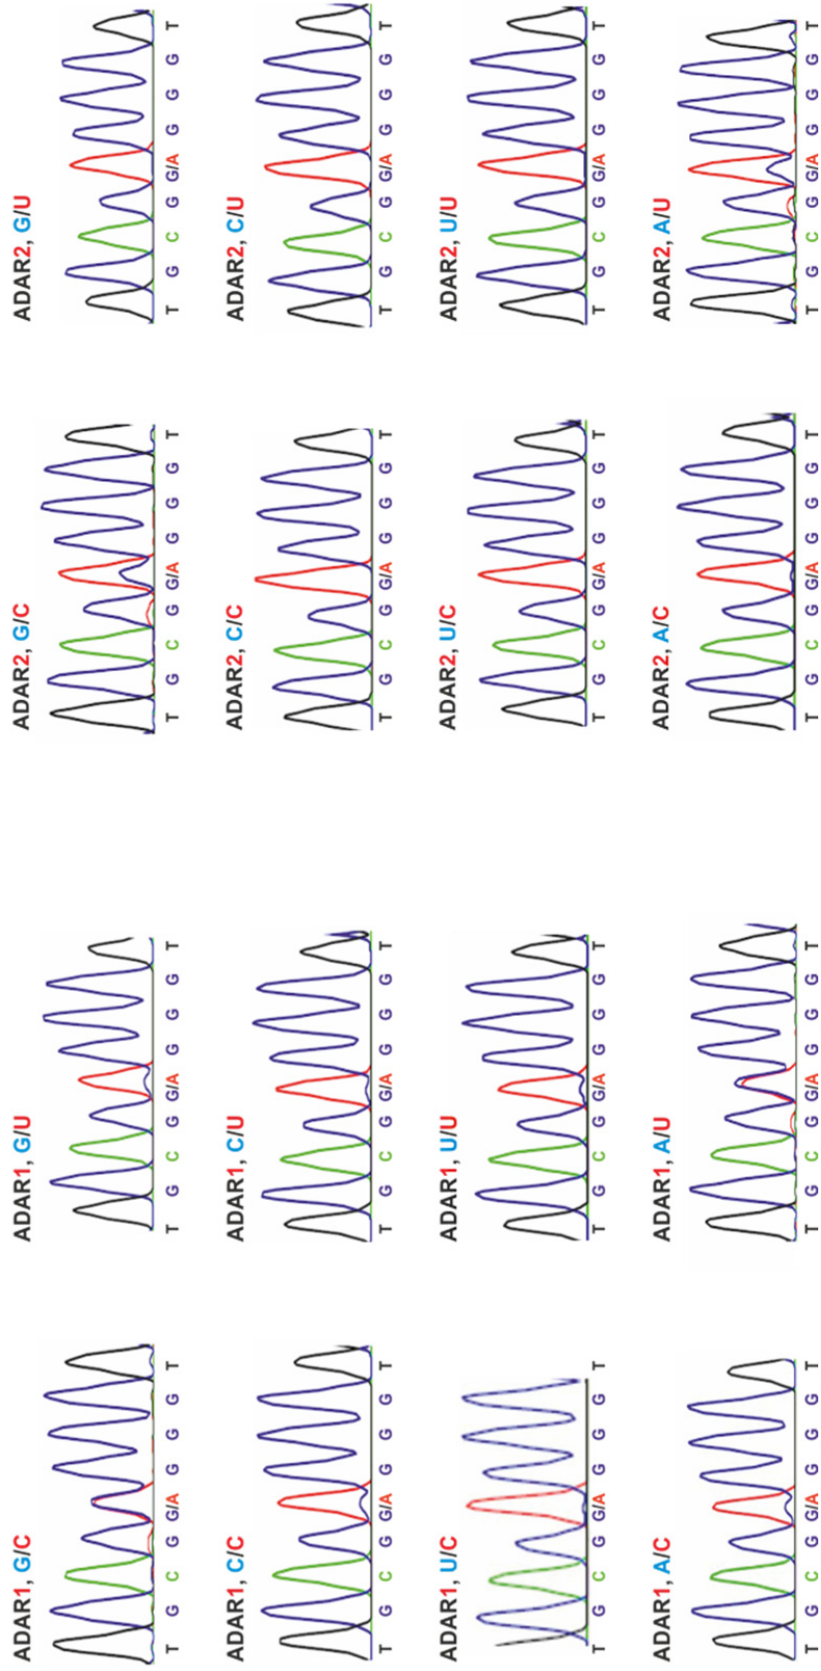



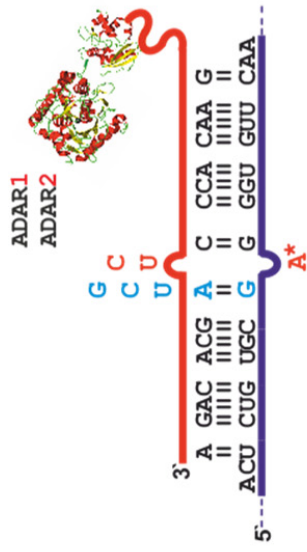

**Figure S5.2.** Replication of the editing of the **GAG codon** shown in Figure S5 under standard conditions including 0.75 mM magnesium.

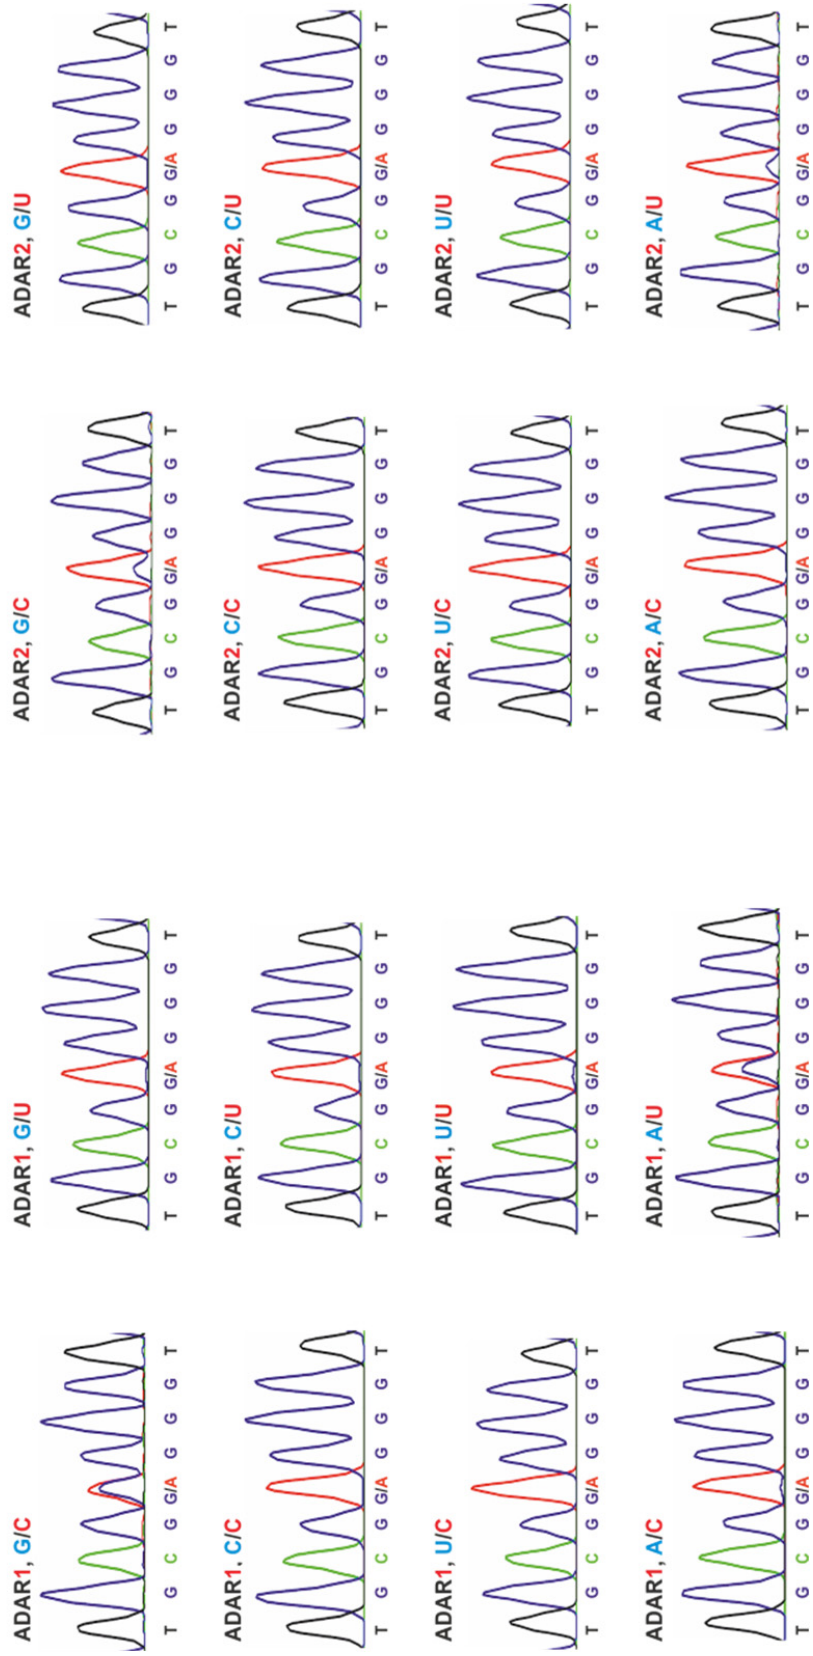

**all XAG codons  
ADAR3**

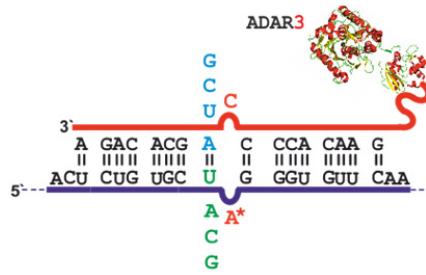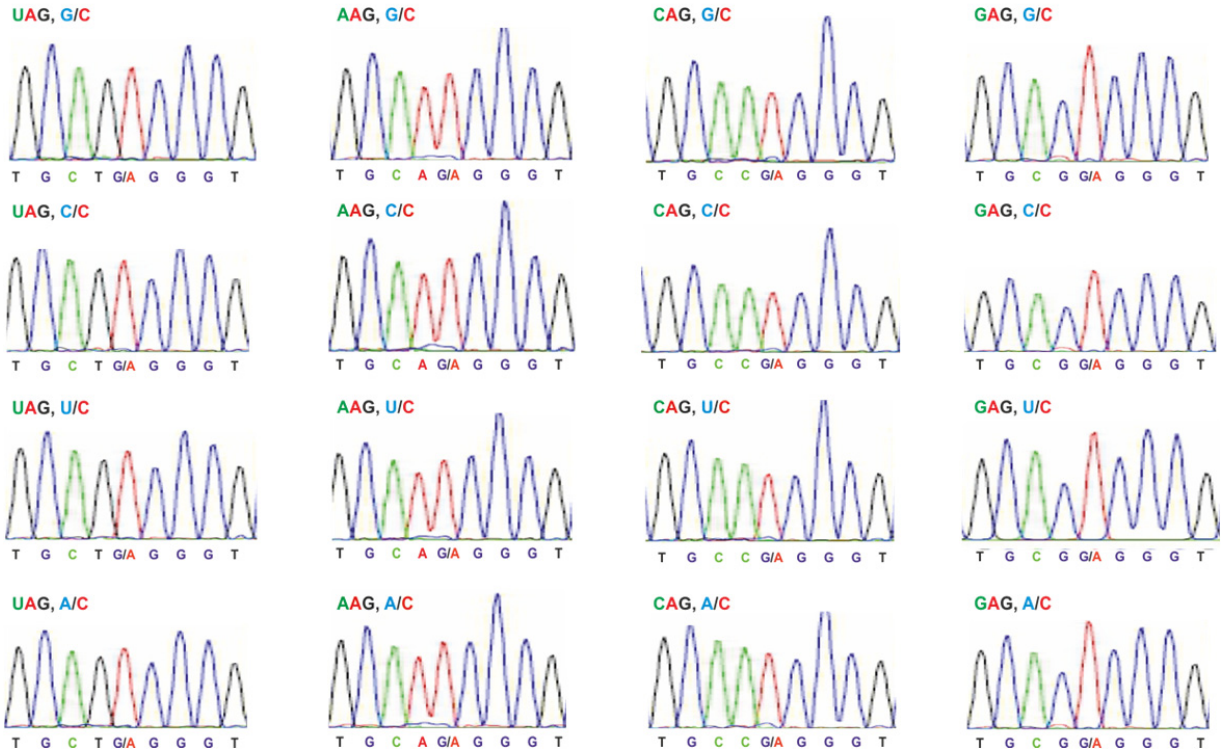

**Figure S6.** Sequencing traces for the editing of all four **XAG codons** ( $X = U, A, C, G$ ) with **SNAP-ADAR3** in presence of one of the four **guideRNAs** putting the targeted adenosine into **A/C mismatch**. Editing was done under standard conditions but in the absence of magnesium as described in the method part of the manuscript.







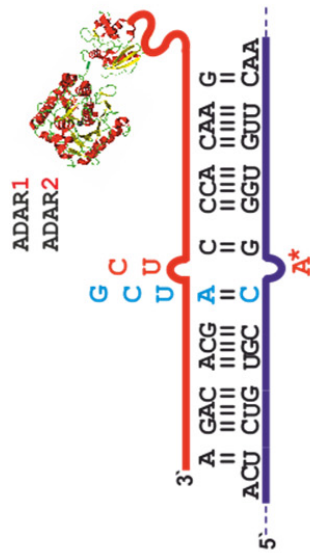

**Figure S9.1.** Sequencing traces for the editing of the **CAG codon** under standard conditions in **absence** of magnesium as described in the method part of the manuscript. All other conditions were kept constant compared to the experiments shown in Figure S4.

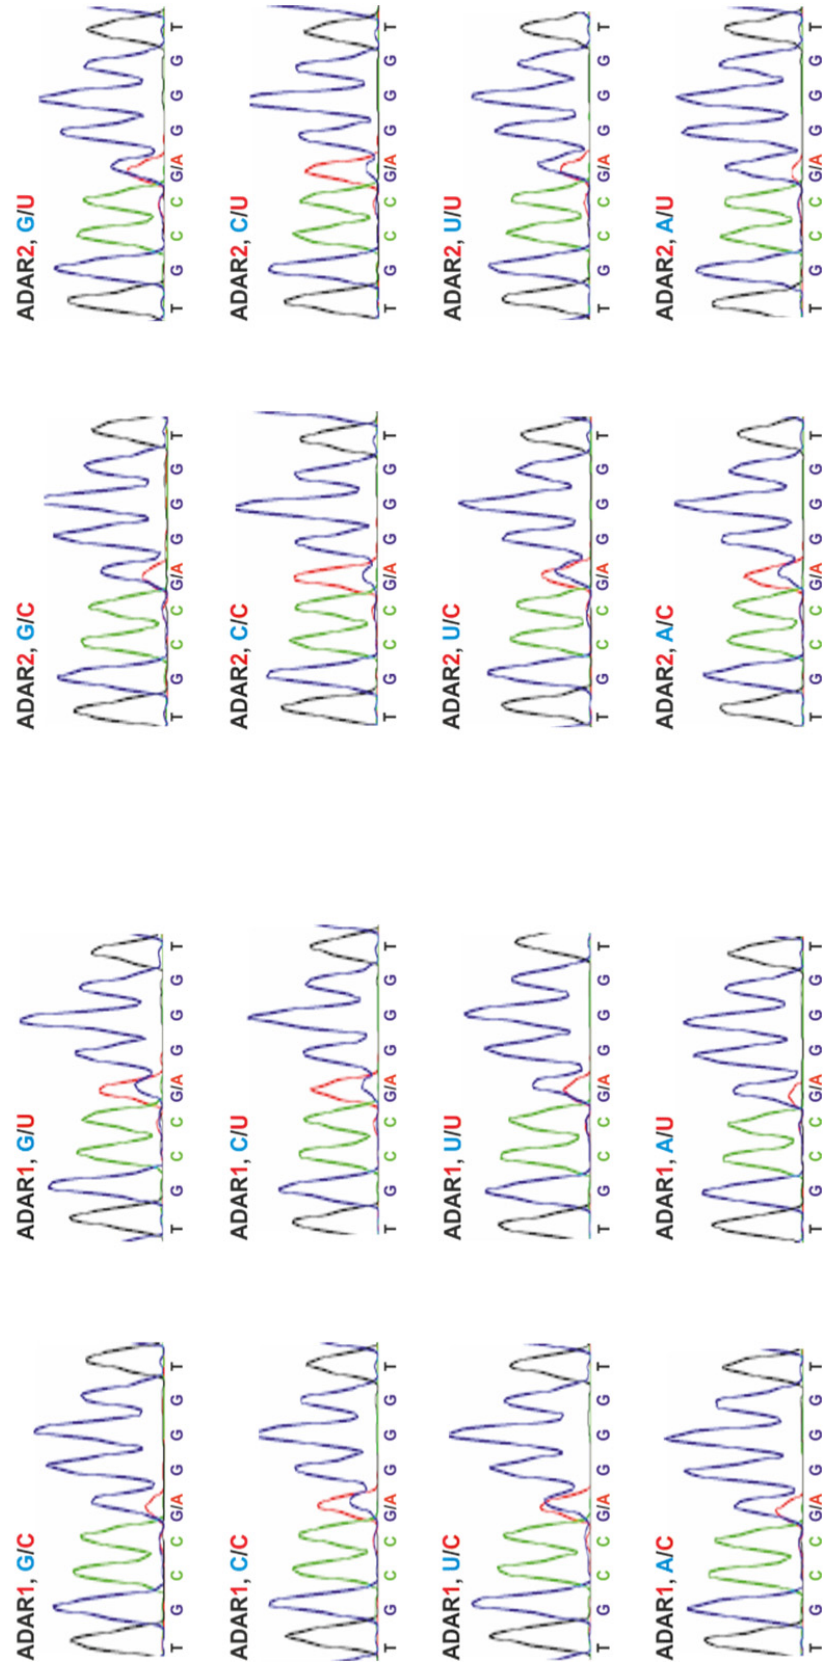

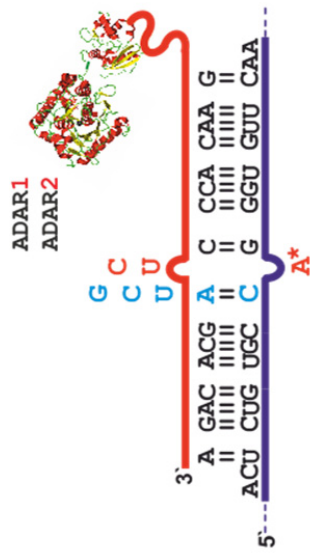

**Figure S9.2.** Replicate of editing of the **CAG codon** under standard conditions in **absence** of magnesium as described Figure S9.1

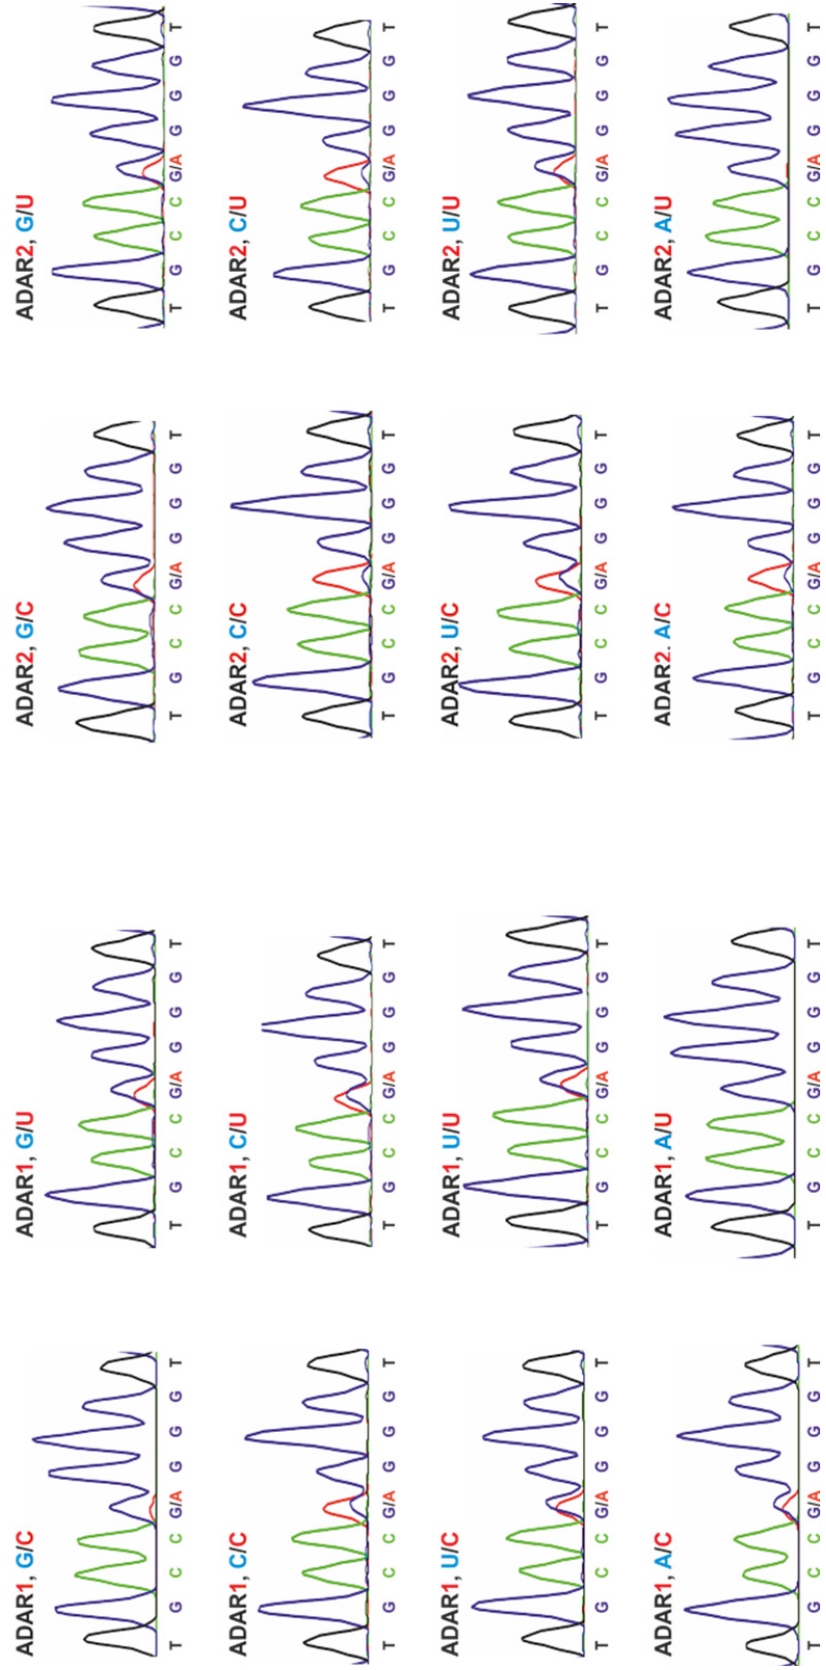

**Figure S10.** Sequencing traces for the editing of the **GAG codon** under standard conditions in **absence of magnesium** as described in the method part of the manuscript. All other conditions were kept constant compared to the experiments shown in Figure S5.

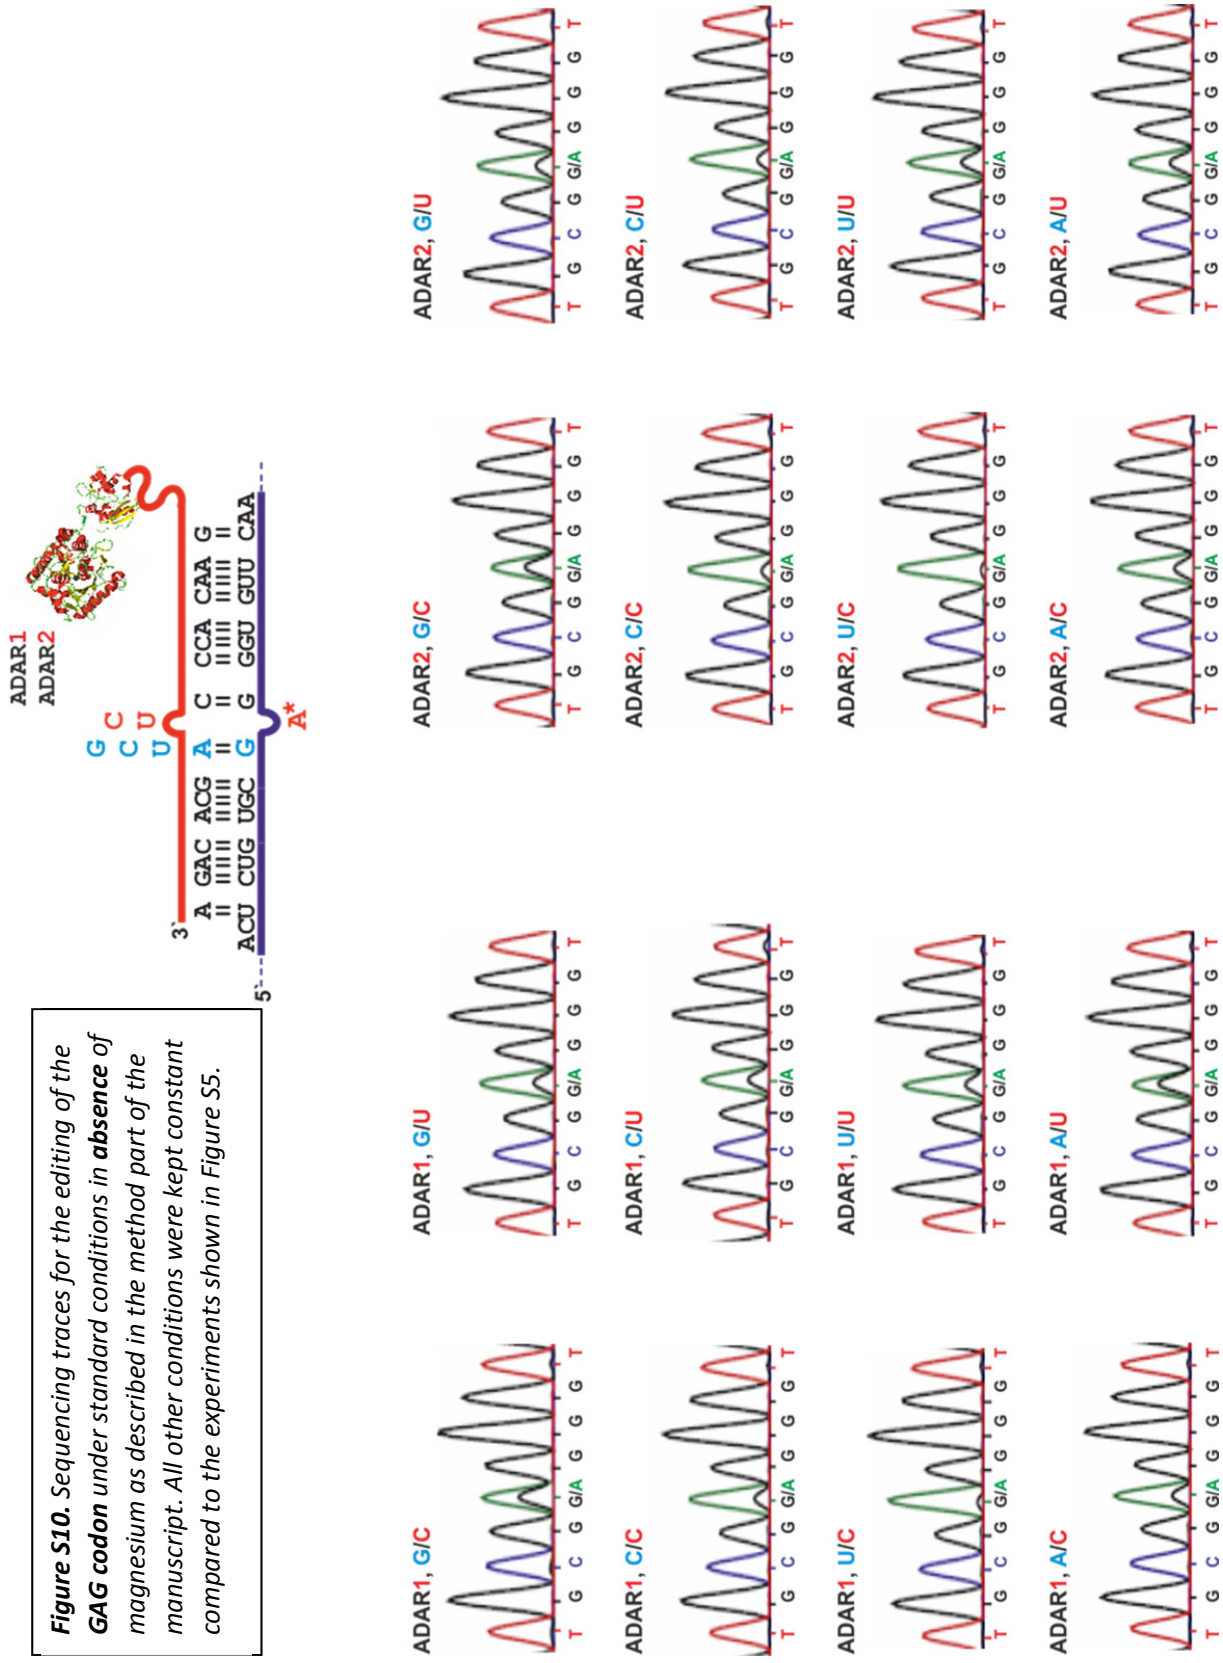

Supplement: supp_gku272_nar-03496-met-g-2013-File007.pdf [file supp_gku272_nar-03496-met-g-2013-File007.pdf]
